# Supplementary material
Source: PubMed Central journal article supplement (PMC2614020)
Supplement: 2008.156984_1.pdf [file 2008.156984_1.pdf]

Supplementary figure

A)

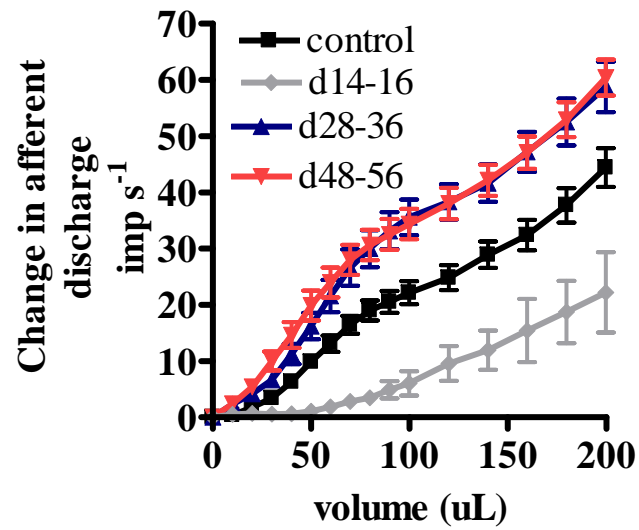

B)

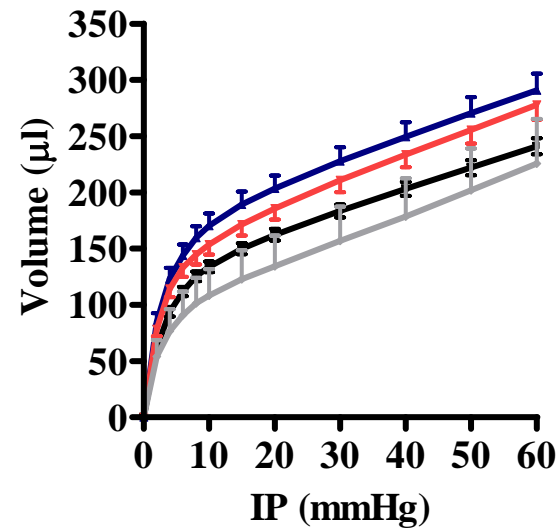

C)

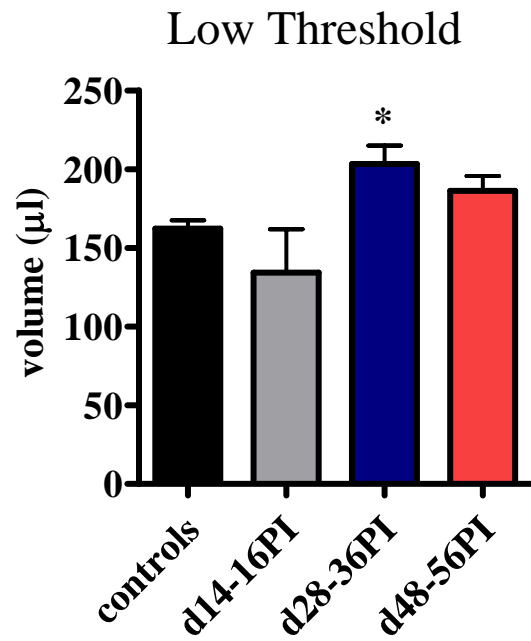

D)

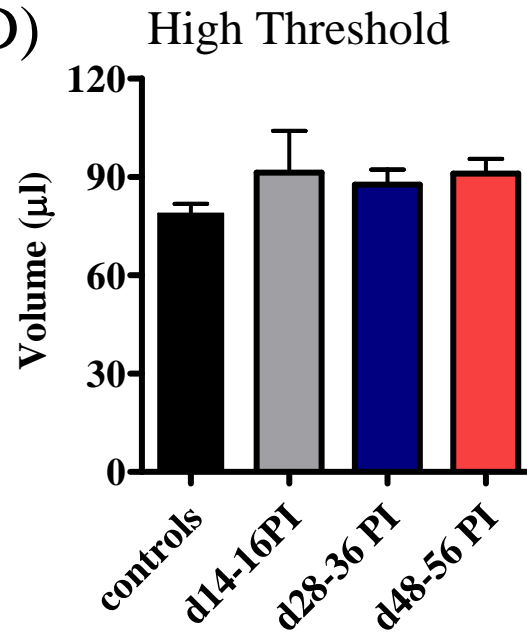

## Supplementary Figure.

A). Volume-response profiles of multi-unit activity from 43 control and 54 post-infected preparations. The volume-response profile was significantly attenuated at d14-16 PI compared to controls ( $p < 0.0001$ ,  $n=8$ ), but was significantly augmented at d28-36 PI, ( $p < 0.0001$ ,  $n=24$ ) and at d48-56 PI ( $p < 0.0001$ ,  $n=22$ ). Significant differences from control were detected above 60  $\mu\text{l}$  for all three time points analysed ( $p \leq 0.05$  Bonferroni *post-hoc* analysis). B). Pressure-volume profiles showing that the compliance of jejunal segments is altered post infection. C) and D) Comparison of the distension volumes required to obtain low threshold (0-20 mmHg) and high threshold (20-60 mmHg) distension levels in control and PI preparations. There was a significant increase in the volume required to attain LT distension levels at d28-36 PI only (\*,  $p < 0.01$ ; One-way ANOVA). However, there is no significant difference in the intraluminal volumes required to attain HT distension levels.
